# Supplementary material
Source: publisher figshare collection journal article supplement (https://acs.figshare.com/ndownloader/files/9416167)
Supplement: Supplementary file 1 [file 9416167]

# Supporting Information

## Novel Approach for *In-situ* Recovery of Lithium Carbonate from Spent Lithium Ion Batteries Using Vacuum Metallurgy

Jiefeng Xiao <sup>a</sup>, Jia Li <sup>a,b\*</sup>, Zhenming Xu <sup>a</sup>

<sup>a</sup> School of Environmental Science and Engineering, Shanghai Jiao Tong University, 800

Dongchuan Road, Shanghai 200240, People's Republic of China

<sup>b</sup> Nanjing University & Yancheng Academy of Environmental Protection Technology and

Engineering, Huanbao Road, Yancheng 224000, People's Republic of China

Corresponding authors: Jia Li, Tel: +86 21 54747495, Fax: +86 21 54747495, E-mail:

[weee@sjtu.edu.cn](mailto:weee@sjtu.edu.cn).

## Supporting Information Content

12 pages (including the cover page)

Economic assessments

5 Figures

3 Tables

**Figure S1** The pre-treatment process to obtain mixed electrode materials from spent batteries

**Figure S2** XRD pattern of white crystals

**Figure S3** (a), (b) effect of temperature and holding time on graphite removal, and (c) XRD patterns of burned powders at different condition.

---

Corresponding author: Jia Li, Tel:+86 21 54747495; Fax:+86 21 54747495; E-mail:

[weee@sjtu.edu.cn](mailto:weee@sjtu.edu.cn)

**Figure S4.** XRD patterns of mixed electrode materials and calcined mixed electrode materials

**Figure S5.** XRD patterns of cathode material and mixed materials calcined at 873 K for 45 min

**Table S1.** Main Composition of Mixed Electrode Powders Gained by Mechanical Separation

**Table S2.** Li-element Recovery Rate <sup>a</sup> from Different Spent LIBs

**Table S3.** Revenues of Products by This Recycling Process

## Economic Assessments

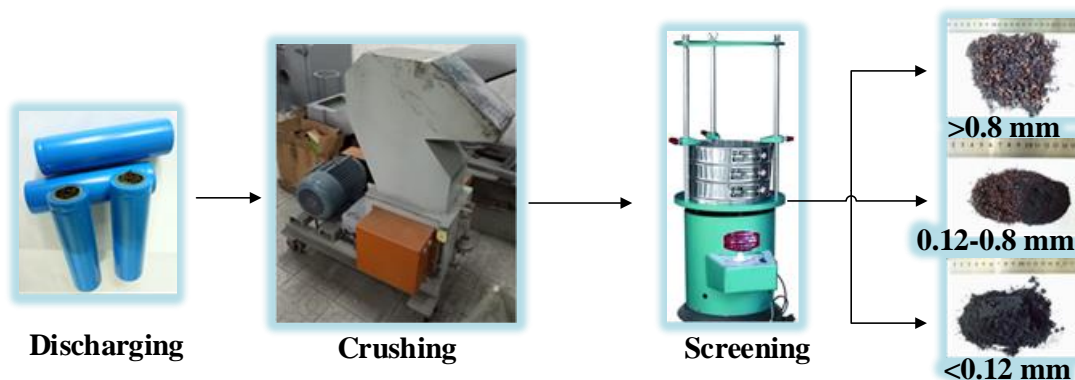

**Figure S1** The pre-treatment processes to obtain mixed electrode materials from spent batteries

After discharging, the batteries are fully crushed and screened to obtain mixed electrode materials whose ingredients are anode powders “graphite” and cathode powders “ $\text{LiMn}_2\text{O}_4$ ” (powders size  $<0.12$  mm) as shown in Figure S1.

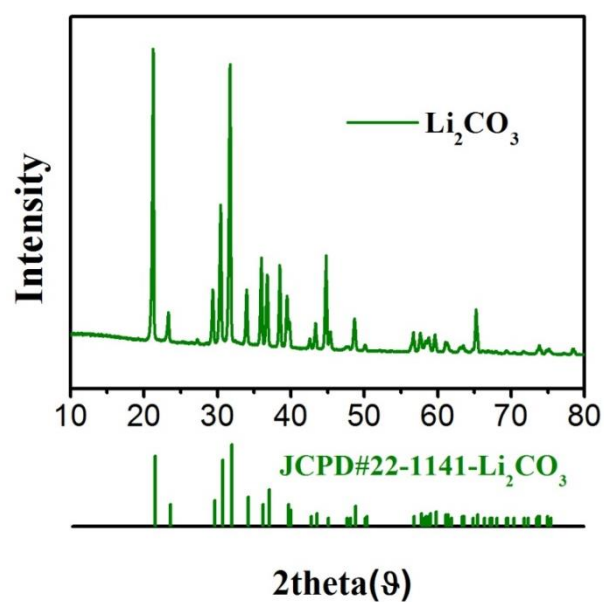

**Figure S2** XRD pattern of white crystals

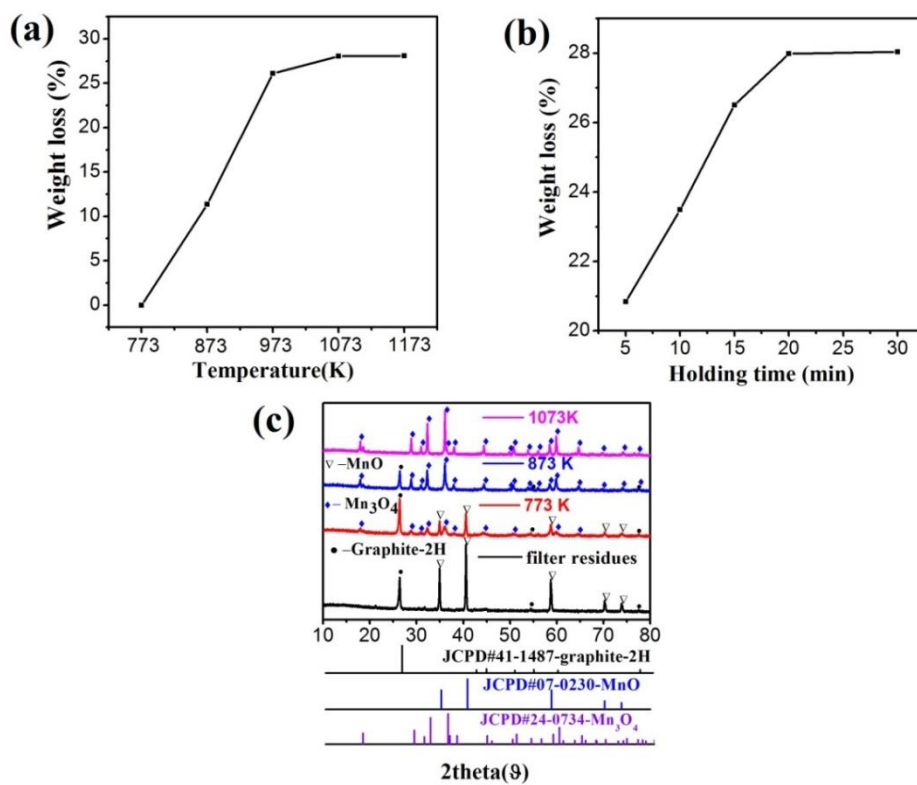

**Figure S3** (a), (b) effect of temperature and holding time on graphite removal, and (c) XRD patterns of burned powders at different condition.

After Li recovery by water leaching process, effects of temperature and holding time on the purity of Mn resource in the filter residues were investigated. In the process, the purity ratio of Mn resource depended on the removal ratio of graphite, so the weight loss rate was used to replace the purity rate. As shown in Figure 3(a), a series of experiments were conducted at different temperatures and the results showed that graphite can be completely removed at 1073 K for 30 min. Besides, Figure 3(c) showed that MnO was oxidized into  $\text{Mn}_3\text{O}_4$  as the final product during the graphite removal. Furthermore, effect of holding time was studied as Figure 3(b). With the rise of holding time, the weight loss gradually increased and then reached a plateau. When holding time was 20 min, the weight loss rate of residues reached the maximum and the purity rate of  $\text{Mn}_3\text{O}_4$  was 96.51%. In a word, the graphite in filter residues was totally burned away at 1073 K for 20 min and the final product as  $\text{Mn}_3\text{O}_4$  was obtained as precursor of cathode materials.

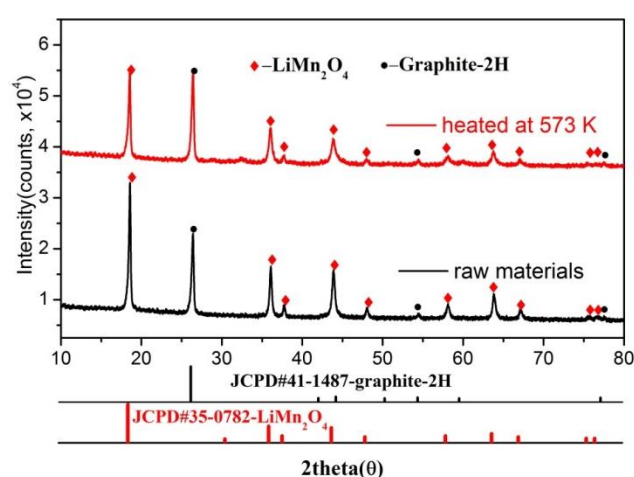

**Figure S4.** XRD patterns of mixed electrode materials and calcined mixed electrode materials

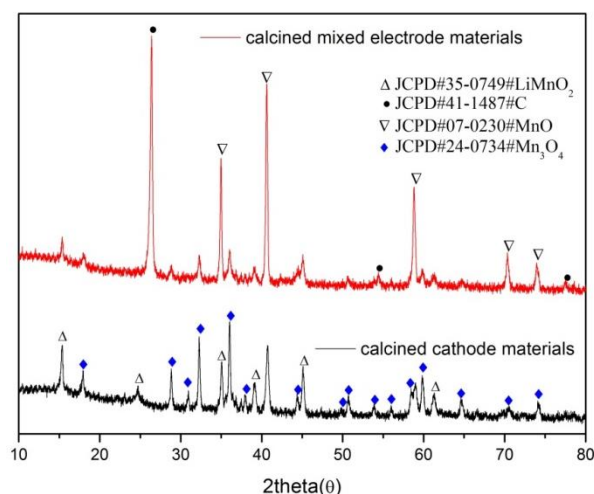

**Figure S5.** XRD patterns of cathode material and mixed materials calcined at 873 K for 45 min

**Table S1. Main Composition of Mixed Electrode Powders Gained by Mechanical Separation**

| Elements        | Li    | Mn    | Cu     | Al     | Fe     | Co     | Ni     | C     |
|-----------------|-------|-------|--------|--------|--------|--------|--------|-------|
| Content (wt. %) | 2.371 | 37.22 | 0.2307 | 0.2276 | 0.0627 | 0.0095 | 0.0062 | 30.83 |

**Table S2. Li-element Recovery Rate <sup>a</sup> from Different Spent LIBs**

|       | LiMn <sub>2</sub> O <sub>4</sub> | LiCoO <sub>2</sub> | LiCo <sub>x</sub> Mn <sub>y</sub> Ni <sub>z</sub> O <sub>2</sub> |
|-------|----------------------------------|--------------------|------------------------------------------------------------------|
| R (%) | 81.90                            | 82.70              | 66.25                                                            |

<sup>a</sup> the pyrolysis powders were leached by water with S:L of 25 g/L just the once.

## Economic Assessments

Assume that the treatment capacity is 10 ton (18650) spent LiMn<sub>2</sub>O<sub>4</sub> per day in China. And the cost of collection and transportation of every battery is \$0.15. And the total amount of batteries was about 27400. So the collection and transportation costs were calculated as the following:

$$C_{C\&T} = \$0.15 \times 27400 = \$4110$$

74 The working day is 300 days per year (average 25 days per month) while the work  
 75 time is about 8 hours every day. And the industrial electricity charge is \$0.20 /kWh  
 76 (maximum), the industrial water charge is \$0.40/t (maximum), the industrial NaCl  
 77 cost is \$58/t. The average wage of per labor is \$900 every month (\$36 per day, 25 day  
 78 per month).

79 Considering the residuals rate and interest rate<sup>1</sup>, depreciation cost of equipment is  
 80 calculated as Eq. (1) while the cost of equipment maintenance cost is calculated as Eq.  
 81 (2):

$$C_D = C_o \times (1 - r) \times \frac{i}{1 - (1 + i)^{-n}} \quad (1)$$

$C_D$  — — — depreciation cost of equipment

$C_o$  — — — acquisition cost of equipment

$r$  — — — Residuals rate of equipment, 4%

$i$  — — — interest rate, 10%

82  $n$  — — — service life, year

$$M_c = C_o \times 0.05 \quad (2)$$

$M_c$  — — — maintenance cost of equipment

$C_o$  — — — acquisition cost of equipment

83 And the cost of electric power, water and labor are calculated as Eq. (3), (4) and (5):

$$C_p = P \times t \times p_e \quad (3)$$

$C_p$  — — — cost of electric power

$p_e$  — — — electricity price for industrial uses, \$0.20/kWh

t – – – working time of equipment

P – – – Equipment power, Kw

85 
$$C_w = V \times p_w \quad (4)$$

$C_w$  – – – cost of water

$p_w$  – – – water price for industrial uses, \$0.4/t

V – – – water consumption, ton/day

86 
$$C_L = m \times p_s \quad (5)$$

$C_L$  – – – cost of labor

87  $p_s$  – – – wage of per labr, \$30/day

m – – – number of workers

88 Finally, the cost of every process and revenue of products in this study were  
89 calculated in detailed and then a day's profit was obtained as follows.

90 **Process I: NaCl-discharging:**

91 *Requirement:* discharging in 5 w.t. % NaCl solution for 12 h, batteries/solution = 1:10

92 w/w (assume that the discharging is done at the night before); about 5 ton of NaCl and

93 30 ton of water were needed in the discharging process; two sets of automatic

94 conveyor belts ( $P_w=7.5\text{kW}$ , per price= \$2000, 2.0 m/s, maximum capacity= 1000 m<sup>3</sup>/h,

95 service life=5 years) work for 1 hour every day.

$$\begin{aligned} C_D &= C_o \times (1 - r) \times \frac{i}{1 - (1 + i)^{-n}} \\ &= \left( \$2000 \times 2 \times \frac{1}{300} \right) \times (1 - 4\%) \times \frac{10\%}{1 - (1 + 10\%)^{-5}} = \$3.38 \end{aligned}$$

$$M_c = C_o \times 0.05$$

$$= \left( \$2000 \times 2 \times \frac{1}{300} \right) \times 0.05 = \$0.67$$

$$96 \quad C_p = P \times t \times p_e$$

$$= 7.5 \text{ kW} \times 1 \text{ h} \times \$0.20/\text{kWh} \times 2 = \$3.0$$

$$C_{NaCl} + C_w = 5 \text{ t} \times \$58/\text{t} + 100 \text{ t} \times \$0.4/\text{t} = \$330$$

$$C_L = 2\text{per} \times \$36/\text{per} = \$72$$

$$97 \quad \text{Total costs: } \$409.05$$

98 Besides, the NaCl solution can be used repeatedly to reduce the consumption.

### 99 **Process II: Crushing and Screening**

100 *Requirements:* One crusher ( $P_w=11 \text{ kW}$ , price= \$14400, maximum capacity = 8

101 ton/hour, service life = 5 years) works for 2 h every day.

$$C_D = C_o \times (1 - r) \times \frac{i}{1 - (1 + i)^{-n}}$$

$$= (\$14400 \times \frac{1}{300}) \times (1 - 4\%) \times \frac{10\%}{1 - (1 + 10\%)^{-5}} = \$12.16$$

$$M_c = C_o \times 0.05$$

$$= \left( \$14400 \times \frac{1}{300} \right) \times 0.05 = \$2.4$$

$$102 \quad C_p = P \times t \times p_e$$

$$= 11 \text{ kW} \times 2 \text{ h} \times \$0.20/\text{kWh} = \$4.4$$

$$C_L = m \times p_s$$

$$= 2 \text{ per} \times \$36/\text{per} = \$72$$

$$103 \quad \text{Total costs: } \$90.96$$

104 After this process, 3.223 ton mixed electrode materials can be obtained by mechanical

105 separation in this study.

### 106 **Process III: Vacuum pyrolysis**

107 *Requirements:* four heating equipment ( $P_w= 55 \text{ kW}$ , per price = \$216000, maximum



capacity = 250 kg/per, service life = 5 years) are needed to respectively work for 4 h every day. In this process, the obtained mixed electrode materials were heated in batches of 16 by four devices, which means every device needs to work 4 times every day. About 200 kg was heated in every device every time.

Electric power charge: the working time including temperature rise and hold is 1 hour every time and the cooling time is 0.5-1 hour.

$$C_D = C_o \times (1 - r) \times \frac{i}{1 - (1 + i)^{-n}}$$

$$= (\$216000 \times 4 \times \frac{1}{300}) \times (1 - 4\%) \times \frac{10\%}{1 - (1 + 10\%)^{-5}} = \$730$$

$$M_c = C_o \times 0.05$$

$$= (\$216000 \times 4 \times \frac{1}{300}) \times 0.05 = \$144$$

$$C_P = P \times t \times p_e$$

$$= 55 \text{ kW} \times 1 \text{ h} \times \$0.20/\text{kWh} \times 16 = \$176$$

$$C_L = m \times p_s$$

$$= 2 \text{ per} \times \$36/\text{per} = \$72$$

Total costs: \$1122

After this process, the calcined powders are about 2.836 ton.

#### **Process IV: leaching and evaporation**

*Requirements:* the calcined powders are leached by water twice with S: L of 25 g/L for 20-30 min. The supernatant liquor was filtered by 4 self-discharging filtering machines ( $P_w = 20 \text{ kW}$ , per price = \$5800, maximum capacity = 4 ton/hour, service year = 3 years) while the slurry was bag-type filtered; about 123.6 ton of water is consumed

At the first leaching, 73.22% of  $\text{Li}_2\text{CO}_3$  was soluble in water and about 300 kg  $\text{Li}_2\text{CO}_3$  crystals can be obtained by evaporation. Then, the filter residues are washed again and total 85 %  $\text{Li}_2\text{CO}_3$  was leached by water. The water consumptions are both 56.8 ton. Every filtering machine needed to work about 4 hours every day.

Specially, the first leaching liquid is mechanically evaporated, which is achieved by two multiple-stage evaporators ( $P_w = 48$  kW, per price = \$72000, maximum capacity = 7ton/hour, service life = 5 years), while the second one is naturally evaporated.

Filtering:

$$C_D = C_o \times (1 - r) \times \frac{i}{1 - (1 + i)^{-n}}$$

$$= (\$5800 \times 4 \times \frac{1}{300}) \times (1 - 4\%) \times \frac{10\%}{1 - (1 + 10\%)^{-3}} = \$30$$

$$M_c = C_o \times 0.05$$

$$= (\$5800 \times 4 \times \frac{1}{300}) \times 0.05 = \$3.87$$

$$C_P = P \times t \times p_e$$

$$= 20 \text{ kW} \times 4 \text{ h} \times \$0.20/\text{kWh} \times 4 = \$64$$

Evaporating:

$$C_D = C_o \times (1 - r) \times \frac{i}{1 - (1 + i)^{-n}}$$

$$= (\$72000 \times 2 \times \frac{1}{300}) \times (1 - 4\%) \times \frac{10\%}{1 - (1 + 10\%)^{-5}}$$

$$= \$122$$

$$M_c = C_o \times 0.05$$

$$= (\$72000 \times 2 \times \frac{1}{300}) \times 0.05 = \$24$$

$$C_P = P \times t \times p_e$$

$$= 48 \text{ kW} \times 5 \text{ h} \times \$0.20/\text{kWh} \times 2 = \$96$$

$$C_L = m \times p_s$$

$$= 4 \text{ per} \times \frac{\$36}{\text{per}} = \$144$$

$$C_w = V \times p_w$$

$$= 56.8 \text{ t} \times 2 \times \$0.4/\text{t} = \$45.44$$

137 Total costs: \$529.31

138 After this process, about 297.83 kg of  $\text{Li}_2\text{CO}_3$  (s) can be obtained by mechanical

139 evaporation and about 47.93 kg of  $\text{Li}_2\text{CO}_3$  (s) can be obtained by natural evaporation.

140 Finally, the filter residues are about 2.490 ton.

#### 141 **Process V: purifying**

142 *Requirements:* the filter residues are heated by 4 furnaces ( $P_w = 20 \text{ kW}$ , per

143 price=\$20000, maximum capacity=200 kg/per, service life=5 years). In this process,

144 the filter residues are heated in batches of 16 by four devices. About 170 kg was

145 heated in every device every time. Electric power charge: the working time including

146 temperature rise and hold is 1 hour every time and the cooling time is 0.5-1 hour.

$$C_D = C_o \times (1 - r) \times \frac{i}{1 - (1 + i)^{-n}}$$

$$= (\$20000 \times 4 \times \frac{1}{300}) \times (1 - 4\%) \times \frac{10\%}{1 - (1 + 10\%)^{-5}} = \$68$$

$$M_c = C_o \times 0.05$$

$$147 = (\$20000 \times 4 \times \frac{1}{300}) \times 0.05 = \$13.33$$

$$148 C_P = P \times t \times p_e$$

$$= 20 \text{ kW} \times 1 \text{ h} \times \$0.20/\text{kWh} \times 16 = \$64$$

$$C_L = m \times p_s$$

$$= 2 \text{ per} \times \$36/\text{per} = \$72$$

149 Total costs: \$217.33.

150 After this process, about 1.76 ton  $\text{Mn}_3\text{O}_4$  powders can be obtained and the purity  
151 rate of  $\text{Mn}_3\text{O}_4$  is 93 %.

152

153 Therefore, the total costs of whole processes ( $C_T$ ) in this study can be calculated:

$$154 \quad C_T = \$409.05 + \$90.96 + \$1122 + \$529.31 + \$217.33 = \$2368.65.$$

155 Further, revenues of products including  $\text{Li}_2\text{CO}_3$  and  $\text{Mn}_3\text{O}_4$  are calculated as shown in  
156 Table SI.

| Table S3. Revenues of Products by This Recycling Process |                       |                 |            |           |
|----------------------------------------------------------|-----------------------|-----------------|------------|-----------|
| Product                                                  | Daily production (kg) | Purity rate (%) | Prices(/t) | Revenue   |
| $\text{Li}_2\text{CO}_3^a$                               | 297.83                | 99.7            | \$17554    | \$5228.11 |
|                                                          | 47.93                 |                 |            | \$841.36  |
| $\text{Mn}_3\text{O}_4$                                  | 1.76                  | 93              | \$1430     | \$2517    |
| Total revenues                                           |                       |                 |            | \$8587    |

157 <sup>a</sup>  $\text{Li}_2\text{CO}_3(\text{s})$  was obtained by two ways: mechanical evaporation and natural  
158 evaporation.

159 Thus, the day's profit (P) can be obtained:

$$160 \quad P = R - C_{C\&T} - C_T = \$8587 - \$4110 - \$2368.65 = \$2108.35$$

161 In summary, the day's profit of this recycling process in this study is \$2108.35.

## 162 Reference

- 163 1. Turton R., Bailie R. C., B. W. W., A. S. J. Analysis, synthesis and design of  
164 chemical processes [M]. PTR Upper Saddle River, New Jersey, USA: Prentice  
165 Hall, **1998**.
